# Supplementary material for: The role of tropical upwelling in explaining discrepancies between recent modeled and observed lower-stratospheric ozone trends
Source: Copernicus journal article supplement (doi:10.5194/acp-23-3347-2023), 2023-03-17
Supplement: Supplementary file 1 [file acp-23-3347-2023-supplement.pdf]

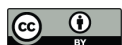

*Supplement of*

## **The role of tropical upwelling in explaining discrepancies between recent modeled and observed lower-stratospheric ozone trends**

**Sean M. Davis et al.**

*Correspondence to:* Sean M. Davis ([sean.m.davis@noaa.gov](mailto:sean.m.davis@noaa.gov))

The copyright of individual parts of the supplement might differ from the article licence.

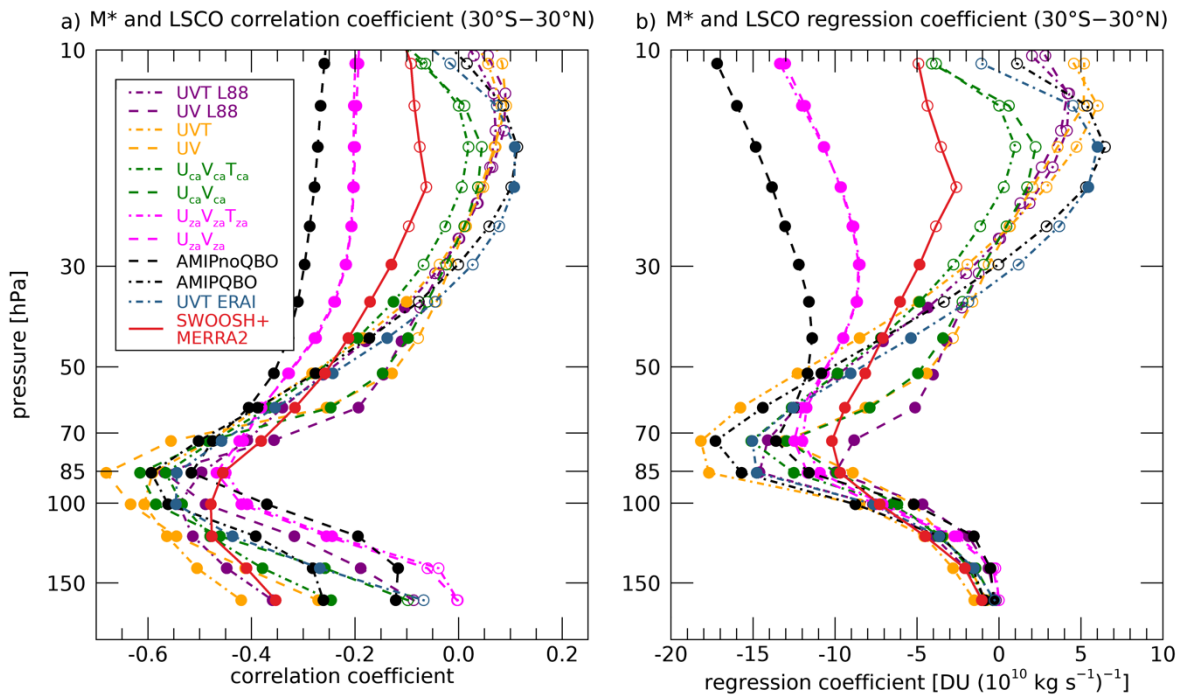

Figure S1: Same as Fig. 4, but for lower stratospheric column ozone computed over  $30^\circ\text{S}$  to  $30^\circ\text{N}$ .

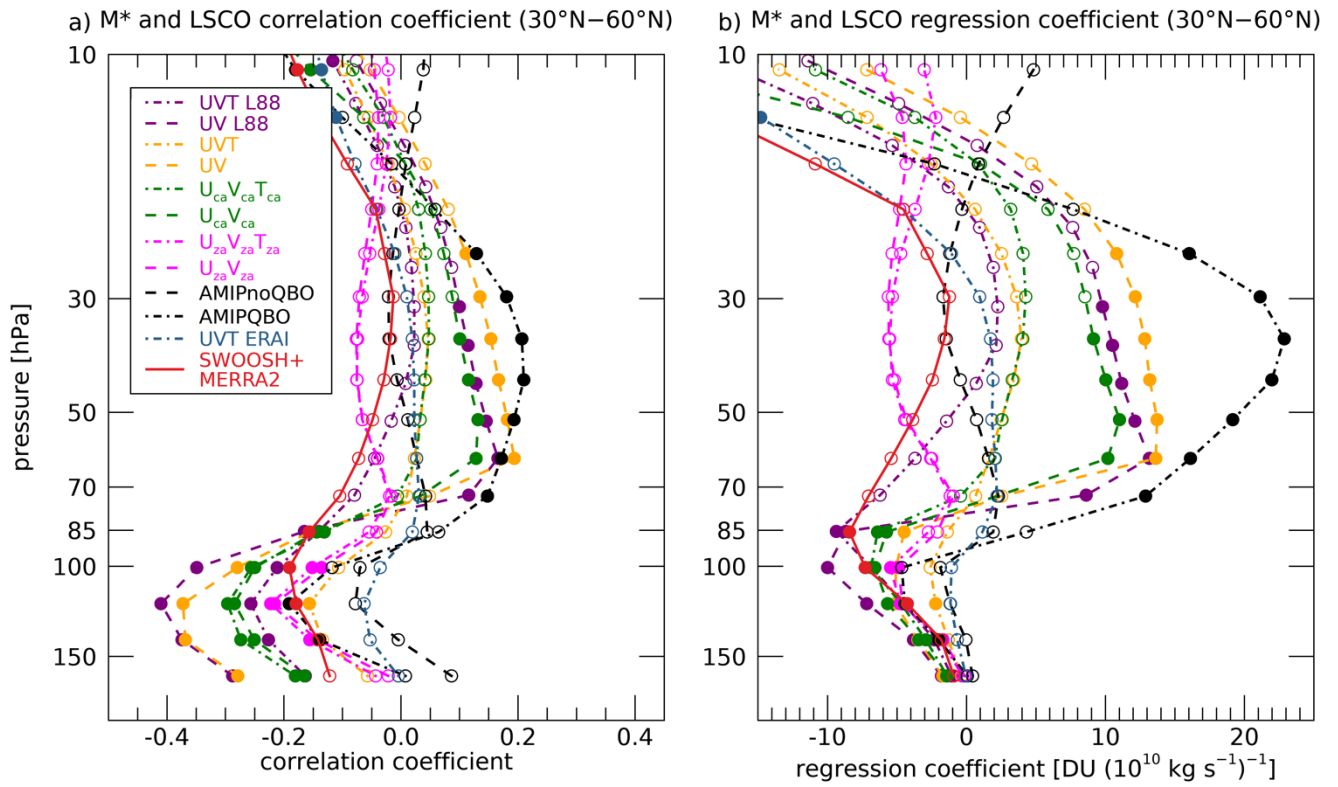

Figure S2: Same as Fig. 4 and, but for lower stratospheric column ozone averaged over 30°N to 60°N.

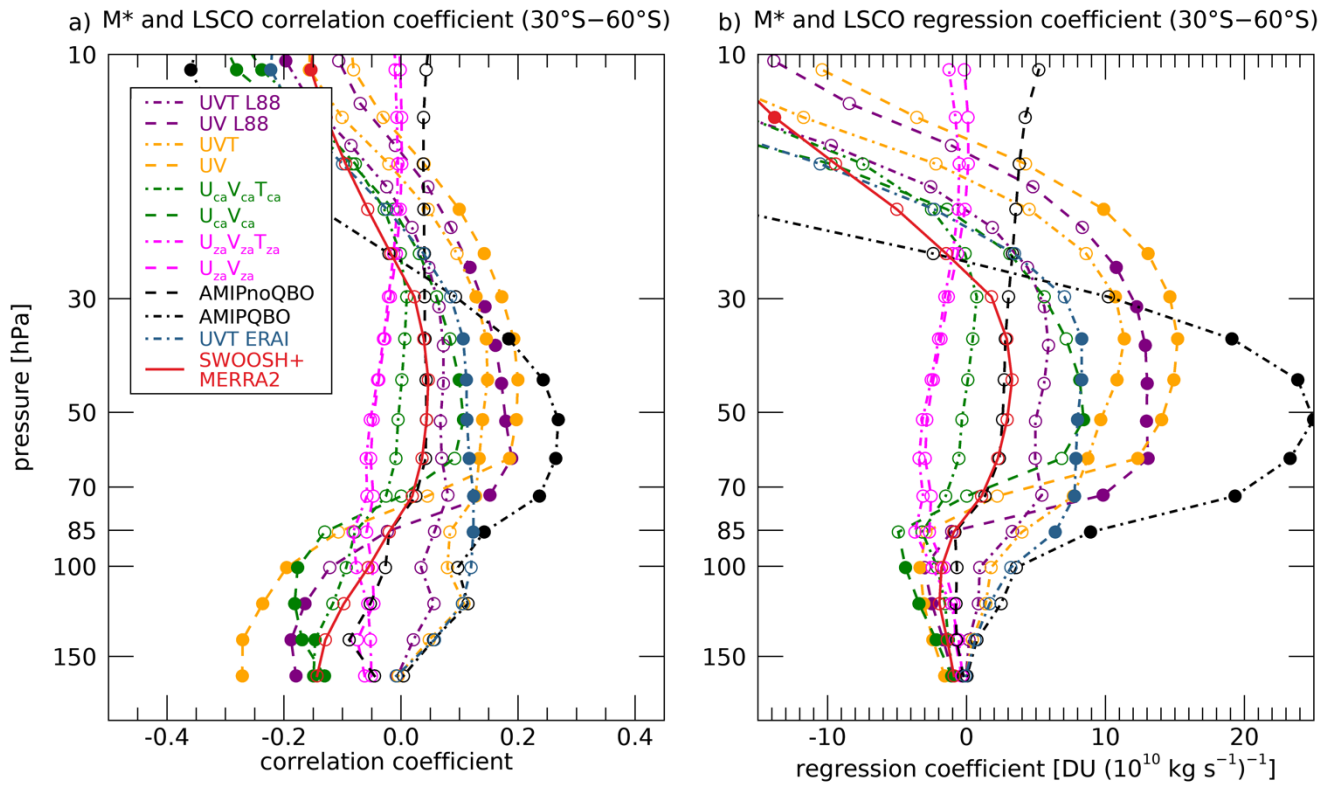

5

Figure S3: Same as Fig. 4, but for lower stratospheric column ozone computed over 30°S to 60°S.

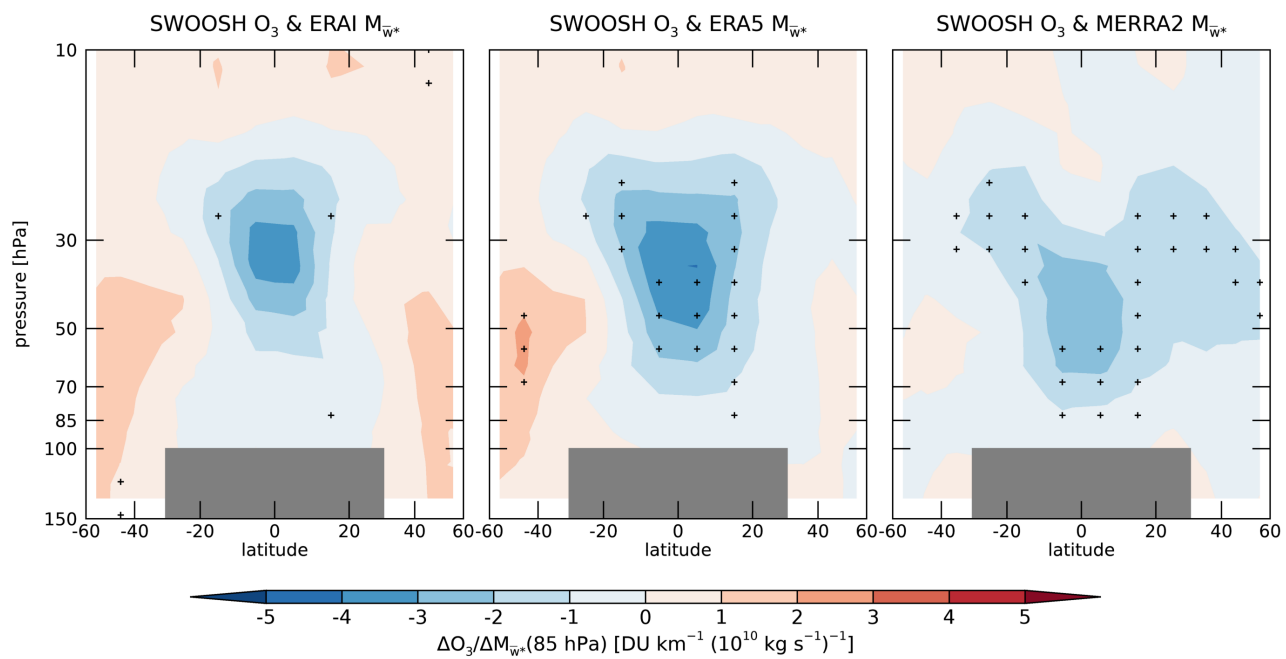

Figure S4: As in Fig. 5, but including all reanalyses.

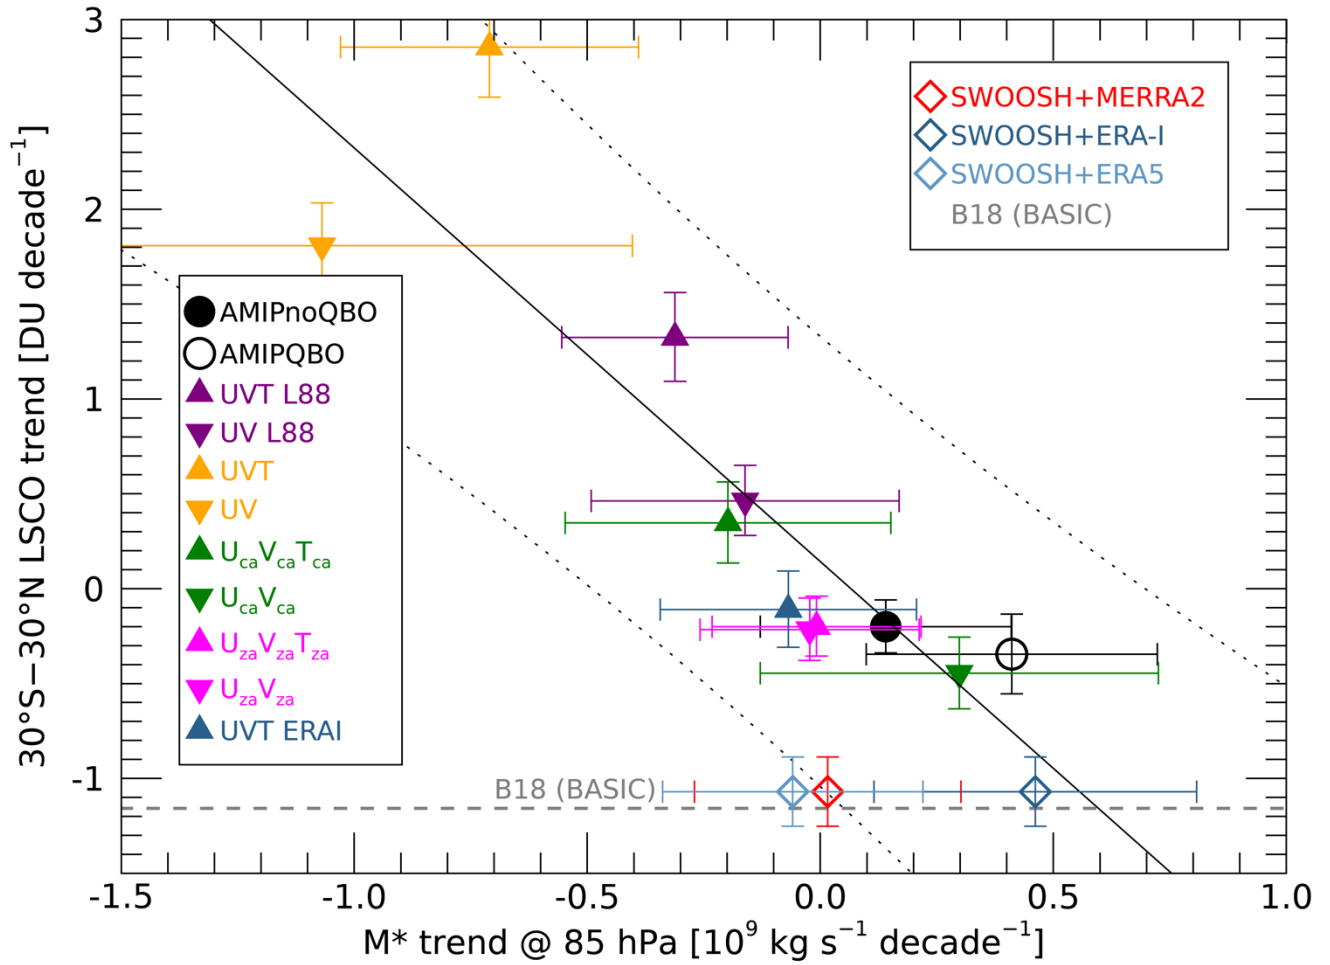

Figure S5: As in Fig. 6, but for the tropics ( $30^{\circ}\text{S} - 30^{\circ}\text{N}$ ).

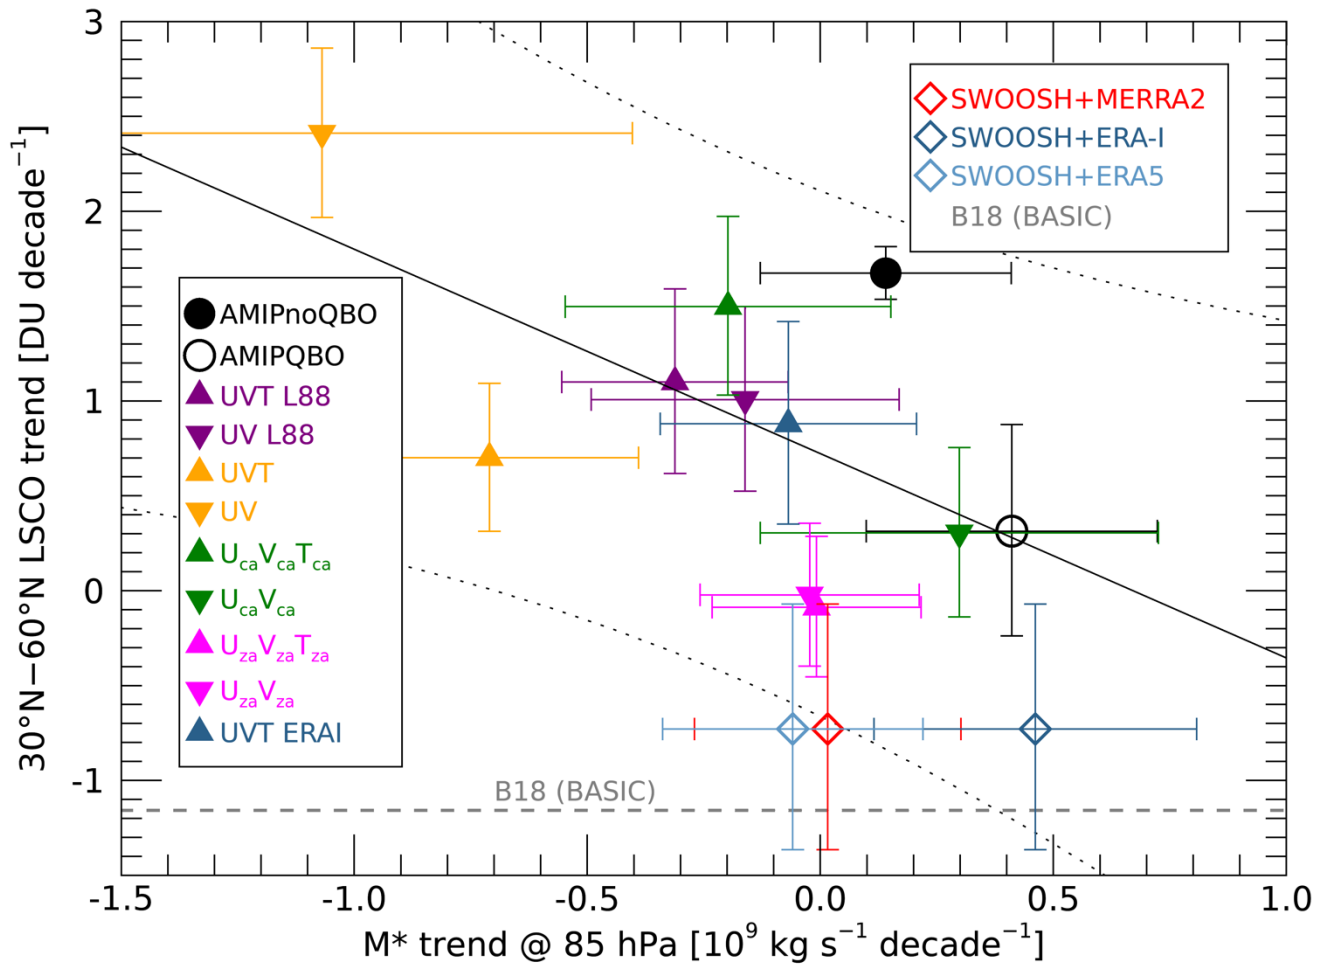

15 Figure S6: As in Fig. 6, but for the NH midlatitudes ( $30^{\circ}\text{N} - 60^{\circ}\text{N}$ ).

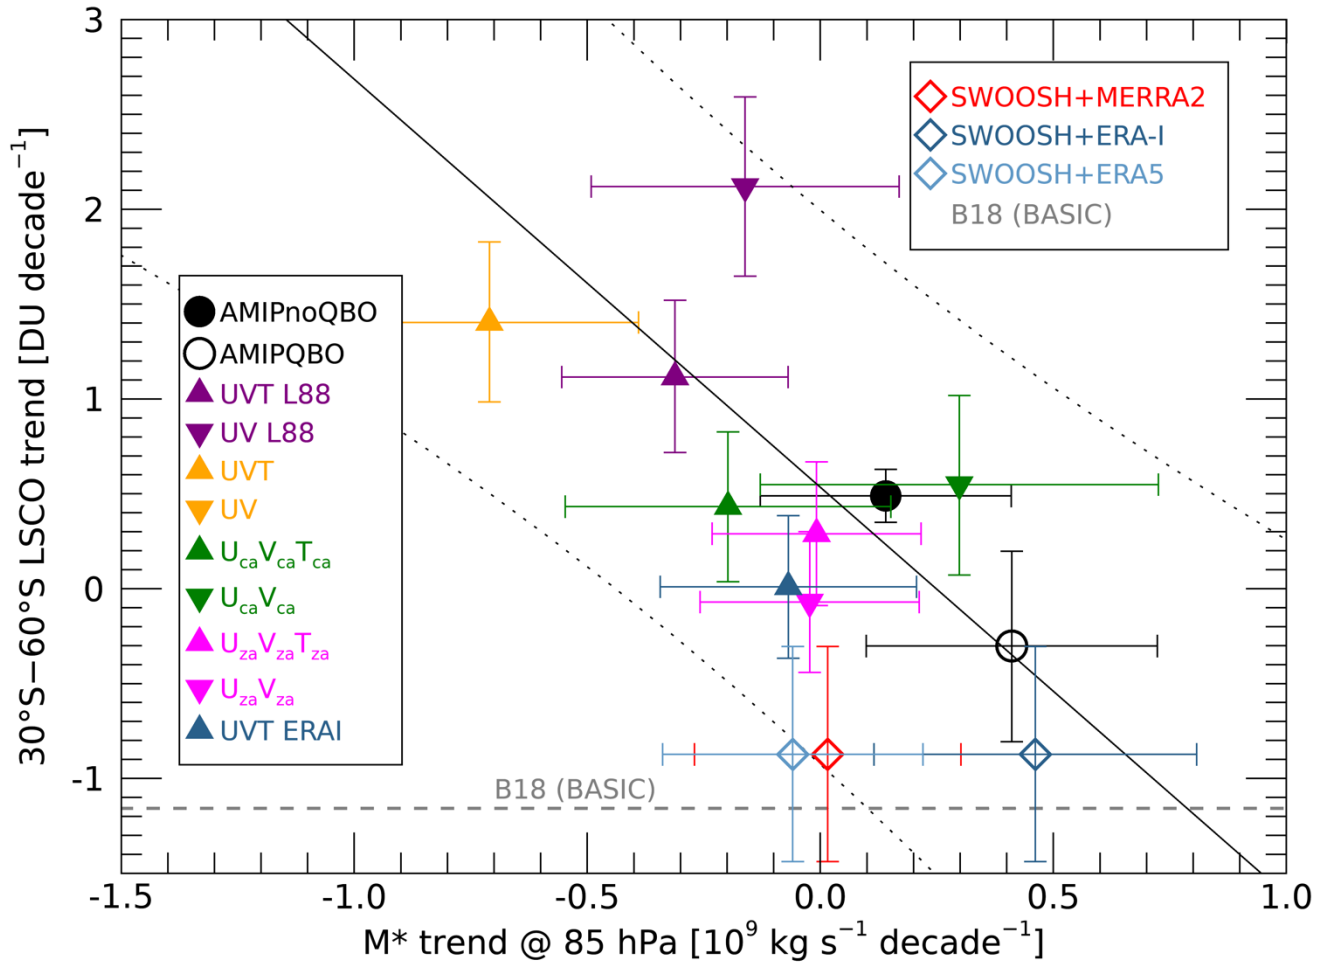

Figure S7: As in Fig. 6, but for the SH midlatitudes (30°S – 60°S).



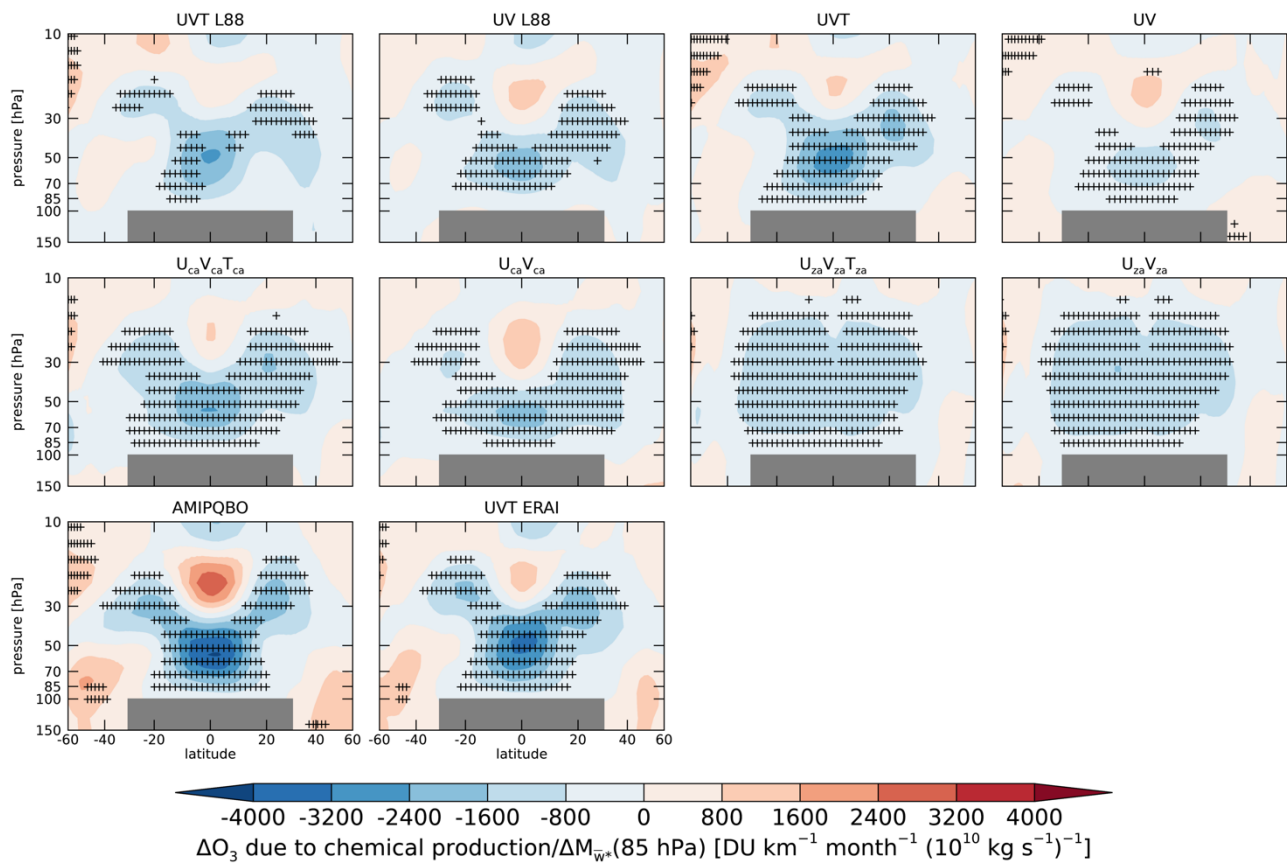

20

Figure S8: As in Fig. 9, but for the ozone tendency due to chemical production. Note that the scale in this figure is a factor of 800 broader than for the net term in Fig. 9, as ozone net production is in general the difference between two large numbers.

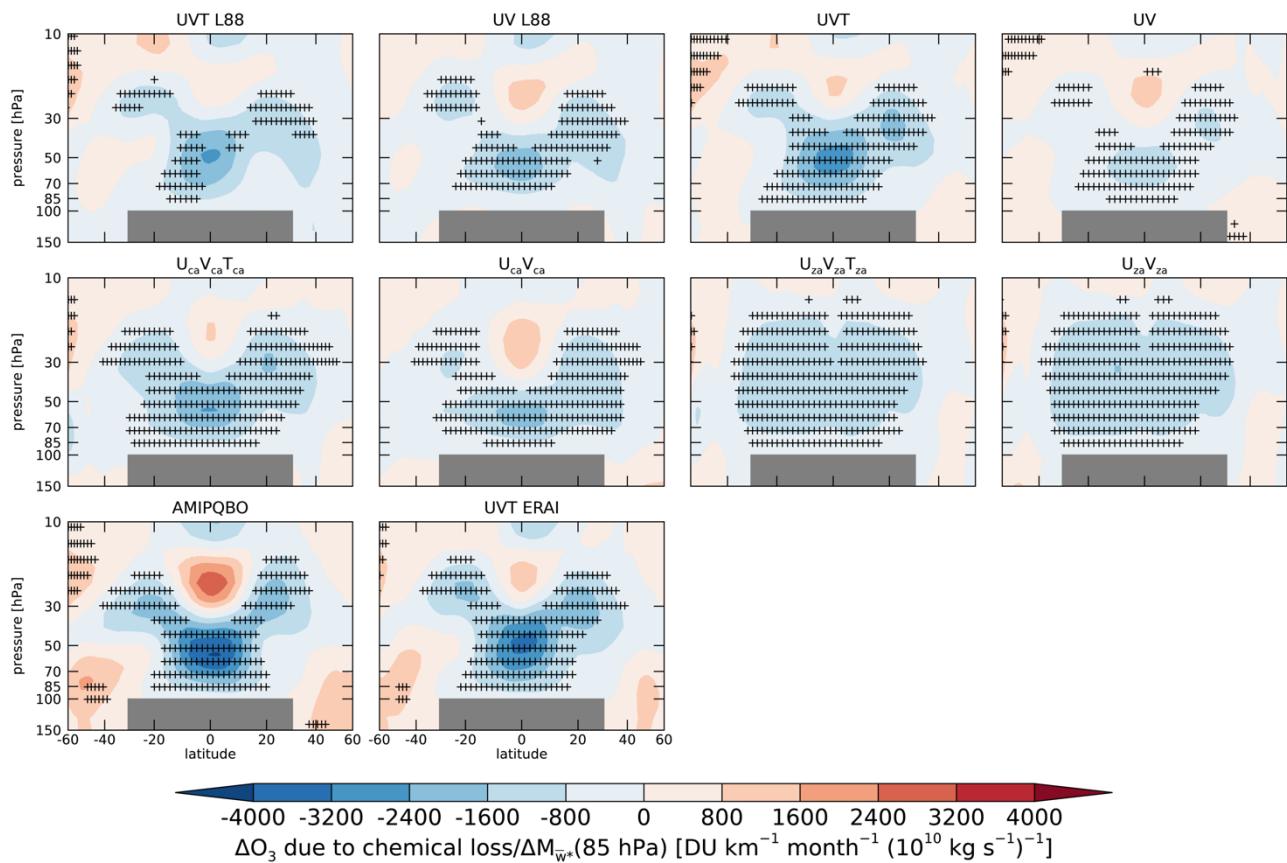

25 **Figure S9:** As in Fig. 9, but for the ozone tendency due to chemical loss. Note that the scale in this figure is a factor of 800 broader than for the net term in Fig. 9, as ozone net production is in general the difference between two large numbers.
